# Supplementary material for: Open and Lys–His Hexacoordinated Closed Structures of a Globin with Swapped Proximal and Distal Sites
Source: PubMed Central journal article supplement (PMC4476040; doi:10.1038/srep11407), 2015-06-22
Supplement: srep11407-s1.pdf [file srep11407-s1.pdf]

Supplementary information

# Open and His–Lys Hexacoordinated Closed Structures of a Globin with Swapped Proximal and Distal Sites

Aik-Hong Teh<sup>1</sup>, Jennifer A. Saito<sup>2</sup>, Nazalan Najimudin<sup>3</sup> & Maqsudul Alam<sup>2,4</sup>

<sup>1</sup>Centre for Chemical Biology, Universiti Sains Malaysia, 10 Persiaran Bukit Jambul, 11900 Bayan Lepas, Penang, Malaysia, <sup>2</sup>Department of Microbiology, University of Hawaii, 2538 McCarthy Mall, Honolulu, HI 96822, United States, <sup>3</sup>School of Biological Sciences, Universiti Sains Malaysia, 11800 Penang, Malaysia, <sup>4</sup>Advanced Studies in Genomics, Proteomics and Bioinformatics, University of Hawaii, 2565 McCarthy Mall, Honolulu, HI 96822, United States.

Correspondence and requests for materials should be addressed to A.H.T. (aikhong@usm.my)

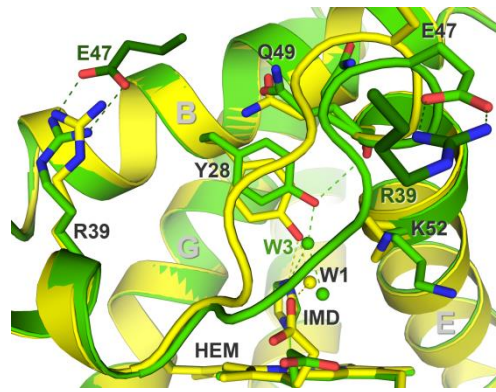

**Supplementary Figure S1 | Conformational changes in subunit B\* of the open form.** Because of interactions with Arg39(C5) and Glu47 from a neighbouring asymmetric unit (dark green), absent in subunit A\* (yellow), a different conformation of loop CE is observed in subunit B\* (green) of the open form. A slight movement of helix E is also observed, allowing Tyr28(B10) in the distal site to move to an upward position similar to that of the closed form, and W3 to move in.

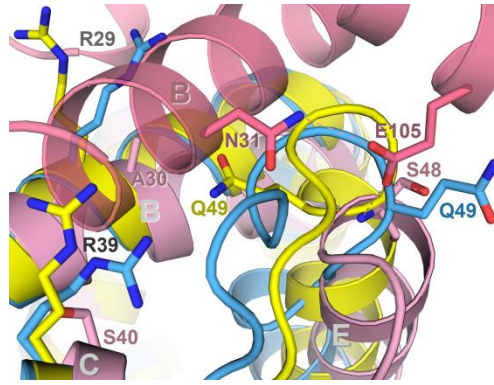

**Supplementary Figure S2 | Absence of HGbI dimerization in *N*-HGbRL.** In both the open (yellow) and closed (blue) forms of *N*-HGbRL, the lengthened loop CE and several residue replacements, such as the bulky Arg29(B11) and Arg39(C5), have disrupted the dimeric interface present in HGbI (pink; second subunit in dark pink).
